# Supplementary material
Source: PubMed Central journal article supplement (PMC4509156)
Supplement: ijcem0008-6735-f4.pdf [file ijcem0008-6735-f4.pdf]

## Effects of the NKETD on immunological imbalance

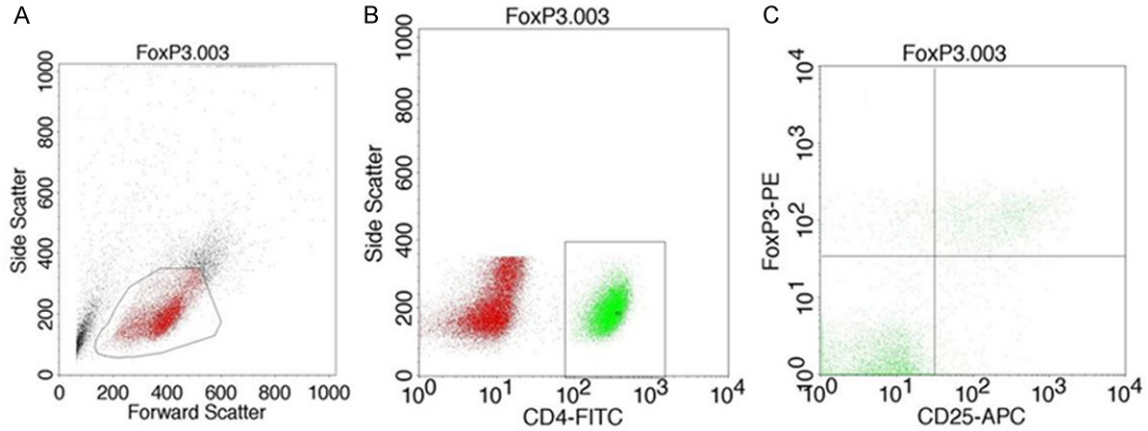

Supplementary Figure 1. Diagram of high-dose nourishing kidney and eliminating toxicity decoction.

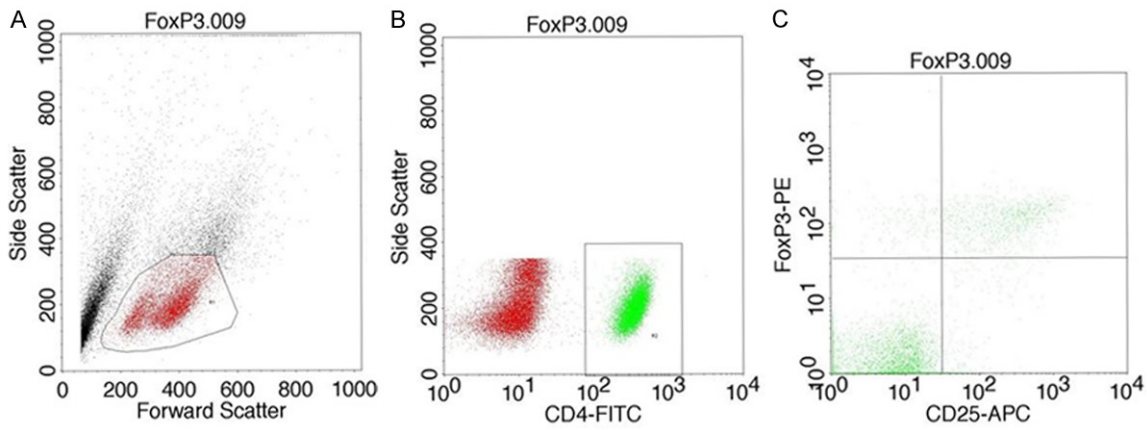

Supplementary Figure 2. Diagram of middle-dose nourishing kidney and eliminating toxicity decoction.

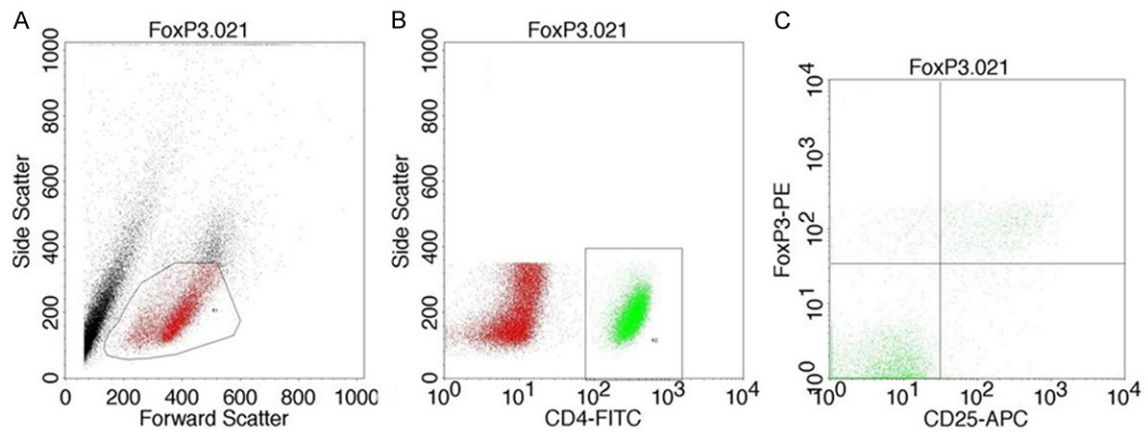

Supplementary Figure 3. Diagram of low-dose nourishing kidney and eliminating toxicity decoction.

## Effects of the NKETD on immunological imbalance

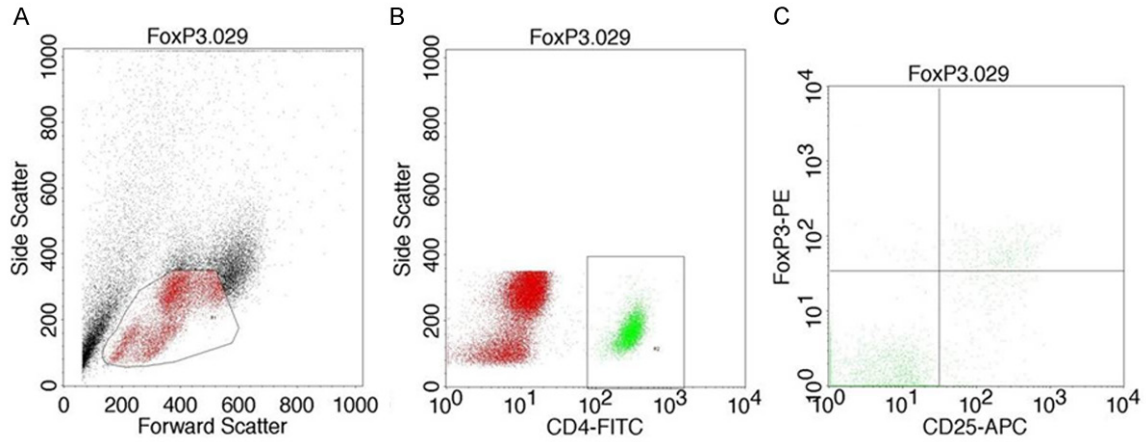

Supplementary Figure 4. Diagram of lamivudine group.

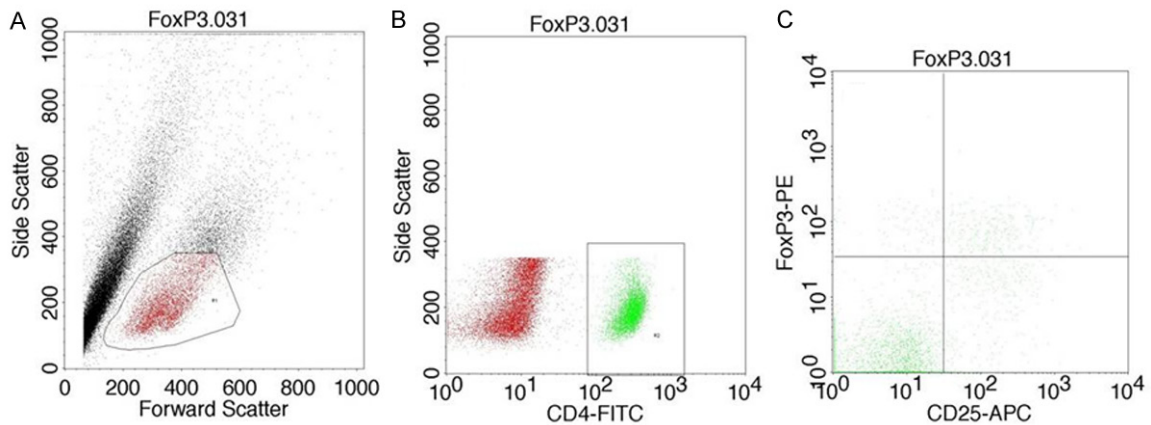

Supplementary Figure 5. Diagram of model control group.

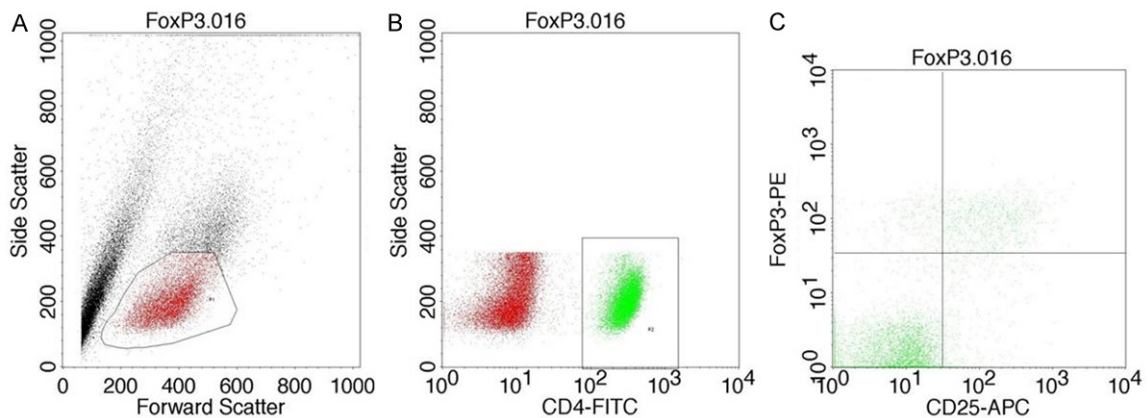

Supplementary Figure 6. Diagram of normal control group.
